# Supplementary material for: A Rapid Quantitative Analysis of Bicomponent Fibers Based on Cross-Sectional In-Situ Observation
Source: MDPI journal article supplement (doi:10.3390/polym15040842), 2023-02-08
Supplement: s1 [file s1]

# A Rapid Quantitative Analysis of Bicomponent Fibers Based on Cross-Sectional In-Situ Observation

Jieyao Qin <sup>1</sup>, Mingxi Lu <sup>1</sup>, Bin Li <sup>2</sup>, Xiaorui Li <sup>1</sup>, Guangming You <sup>1</sup>, Linjian Tan <sup>1</sup>, Yikui Zhai <sup>3</sup>, Meilin Huang <sup>1,\*</sup> and Yingzhu Wu <sup>1,\*</sup>

<sup>1</sup> School of Textile Materials and Engineering, Wuyi University, Jiangmen 529020, China

<sup>2</sup> College of Innovation and Entrepreneurship, Wuyi University, Jiangmen 529020, China

<sup>3</sup> College of Intelligent Manufacturing, Wuyi University, Jiangmen 529020, China

\* Correspondence: hml@wyu.edu.cn (M.H.); wyz@wyu.edu.cn (Y.W.)

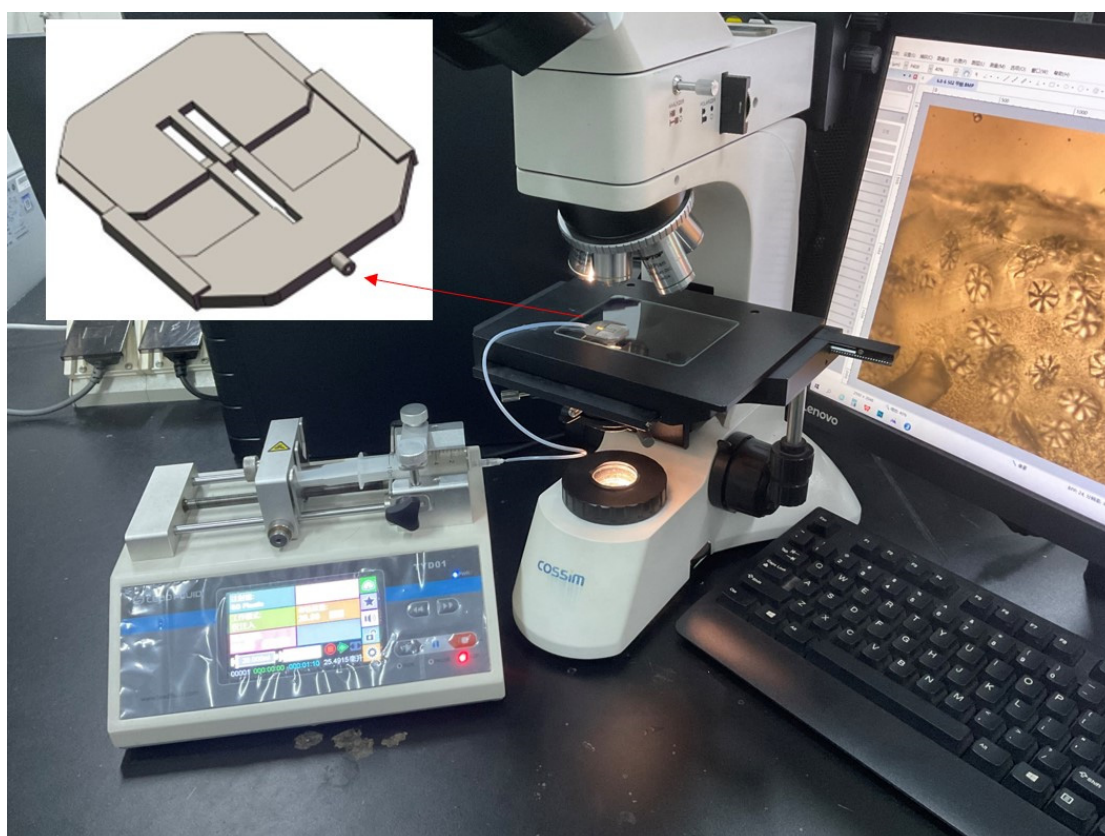

**Figure S1.** In-situ dissolving equipment and the new slicer.

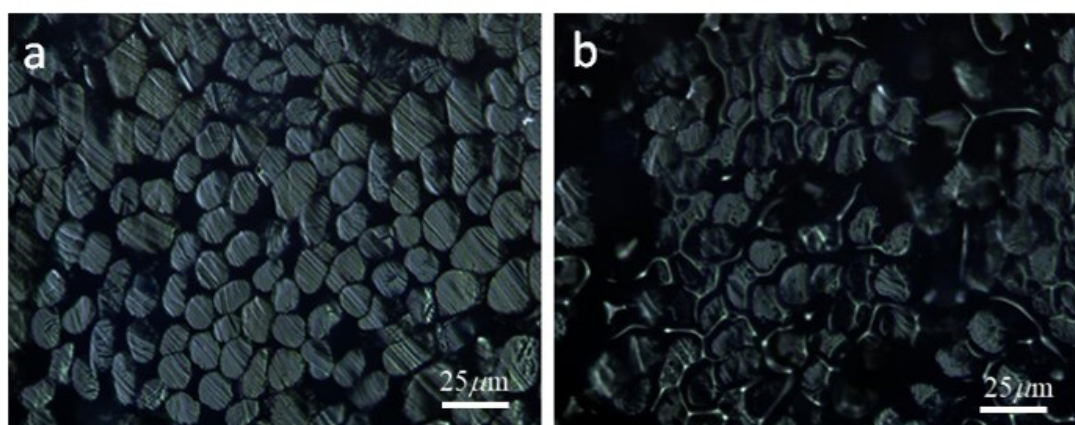

**Figure S2.** In-situ dissolving of wool/ acrylic fibers(a) Before adding basic sodium hypochlorite solvent, (b) After adding basic sodium hypochlorite solvent to dissolve the wool fibers.

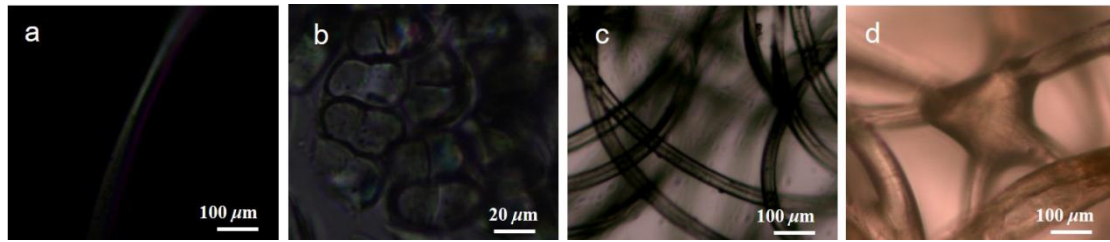

**Figure S3.** the Melting process of side-by-side bicomponent fibers (PET/PTT) with longitudinal direction (a) the polarization performance of PET/PTT bicomponent fibers with longitudinal direction, (b) the cross-section of PET/PTT bicomponent fibers, (c) Before heated to melt, (d) PET/PTT bicomponent fibers with longitudinal direction were heated to melt.

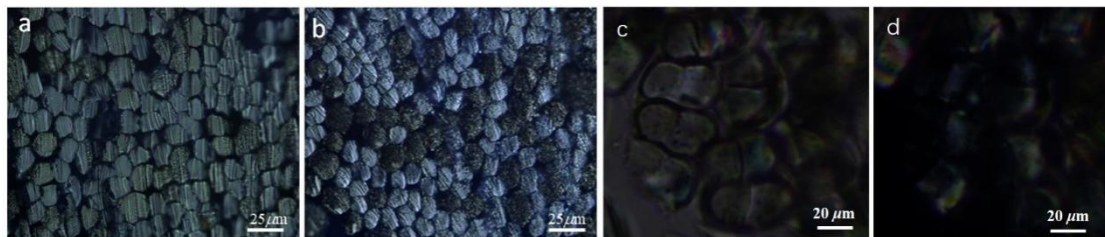

**Figure S4.** the polarization performance of wool/ acrylic blended fibers and side-by-side PET/PTT bicomponent fibers (a) wool/ acrylic blended fibers before polarizing experiment, (b) wool/ acrylic blended fibers after polarizing experiment, (c) the cross-section of PET/PTT bicomponent fibers before polarizing experiment, (d) the cross-section of PET/PTT bicomponent fibers after polarizing experiment.

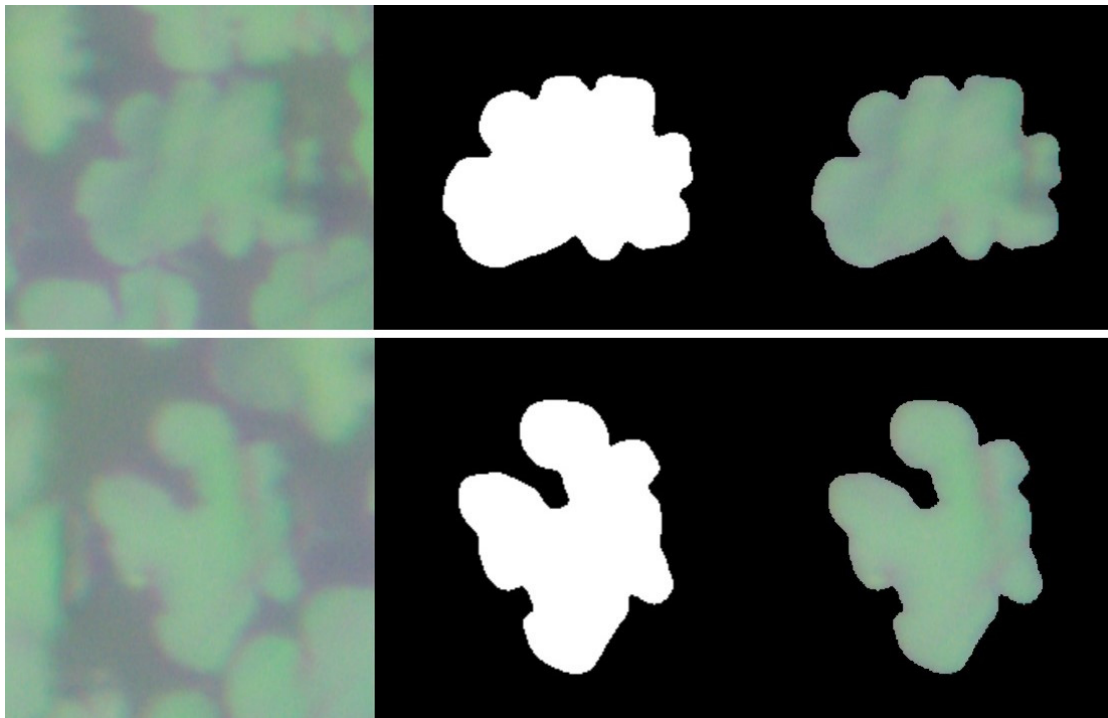

**Figure S5.** Labeled images of viscose fibers for establishment of their identification model.
