# Supplementary material for: A Rapid Quantitative Analysis of Bicomponent Fibers Based on Cross-Sectional In-Situ Observation
Source: Polymers (Basel). 2023 Feb 8;15(4):842. doi: 10.3390/polym15040842 (PMC9964497; doi:10.3390/polym15040842)
Supplement: Supplementary file 1 [file polymers-15-00842-s001.zip]

Archive with 5 entries (5 files):
- polymers-2188014-supplementary.pdf
- polymers-2188014-Video S1.mp4
- polymers-2188014-Video S2.mp4
- polymers-2188014-Video S3.mp4
- polymers-2188014-Video S4.mp4
